# Supplementary material
Source: PubMed Central journal article supplement (PMC9732763)

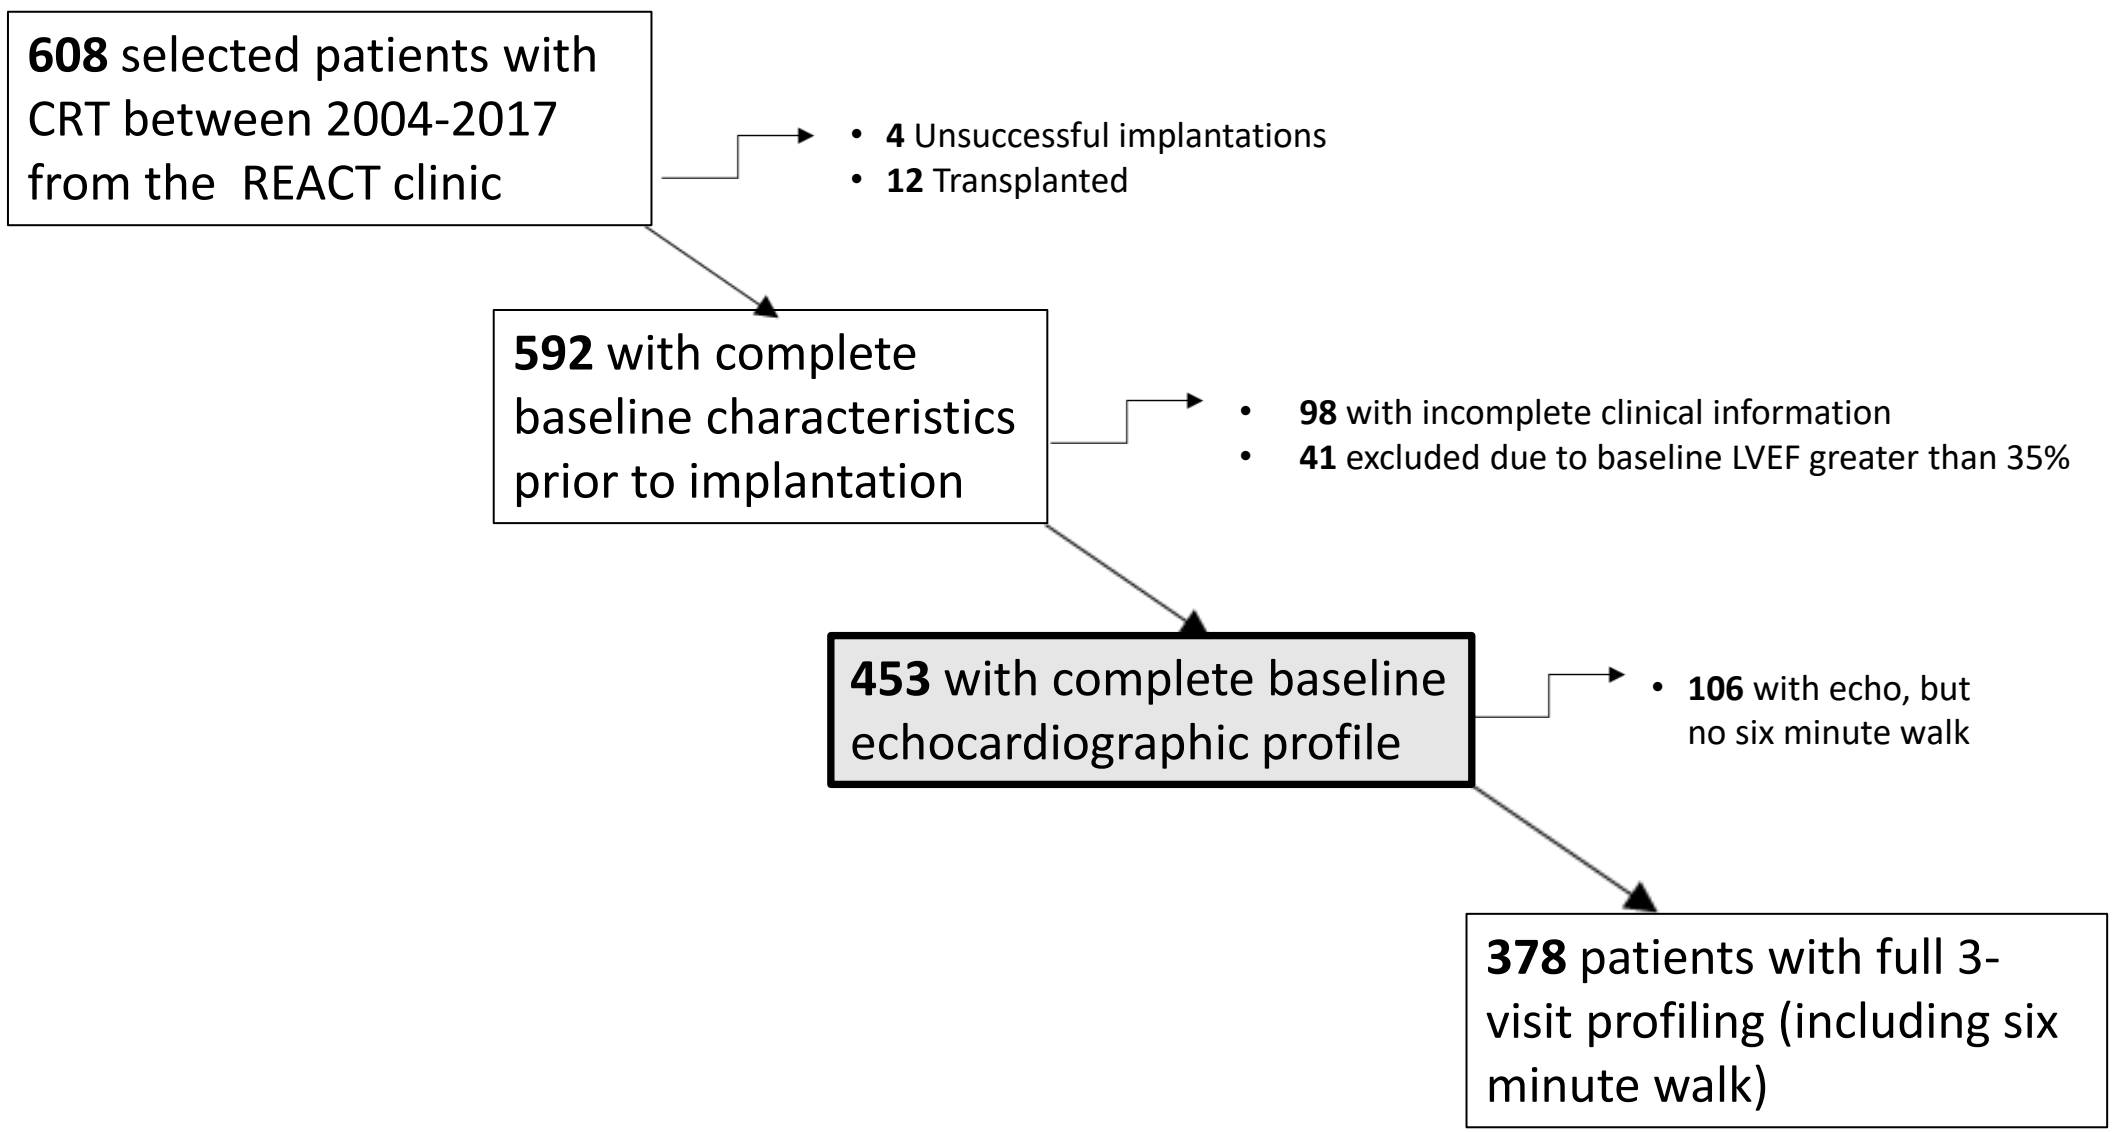

**Figure 1.** Enrollment and follow up of patients in REACT-CRT

Supplement: NIHMS1853111-supplement-Supplemental_Figure_1.pdf [file NIHMS1853111-supplement-Supplemental_Figure_1.pdf]
